# Supplementary material for: Predicting response to radiotherapy of intracranial metastases with hyperpolarized 13C MRI
Source: PubMed Central journal article supplement (PMC8084843; doi:10.1007/s11060-021-03725-7), 2021-03-19
Supplement: 11060_2021_3725_MOESM1_ESM.pdf [file 11060_2021_3725_MOESM1_ESM.pdf]

| ID# | Age / Gender | Primary | Location         | Lac z-score | Status      | Dose (Gy) | Frac | Other organs involved            | # Previous systemic therapies |
|-----|--------------|---------|------------------|-------------|-------------|-----------|------|----------------------------------|-------------------------------|
| 11  | 75/M         | NSCLC   | brainstem        | -0.89       | stable      | 15        | 1    | lung, brain                      | 0                             |
| 12  | 66/M         | RCC     | R cerebellum     | 3.74        | progressed  | 18        | 1    | lung                             | 2                             |
| 20  | 70/F         | NSCLC   | L occipital lobe | 0.39        | responding  | 20        | 1    | lung, lymph nodes                | 2                             |
| 24  | 57/F         | Breast  | R parietal       | 2.50        | responding  | 27.5      | 5    | lymph nodes                      | 2                             |
|     |              |         | R temporal       | -0.78       | stable      |           |      |                                  |                               |
|     |              |         | L frontal        | -1.13       | pre-treated |           |      |                                  |                               |
| 27  | 46/F         | NSCLC   | R frontal        | 0.81        | responding  | 27.5      | 5    | lung                             | 1                             |
|     |              |         | L frontal        | -0.56       | responding  |           |      |                                  |                               |
| 34  | 60/M         | NSCLC   | L cerebellum     | 0.94        | progressed  | 24        | 3    | lung, bone                       | 1                             |
| 36  | 58/M         | Rectal  | L cerebellum     | -0.77       | progressed  | 25        | 5    | lung, liver, lymph nodes         | 3                             |
|     |              |         | R cerebellum     | -1.95       | progressed  |           |      |                                  |                               |
| 37  | 45/M         | RCC     | L cerebellum     | 1.22        | stable      | 25        | 5    | kidney, liver, lung, lymph nodes | 3                             |
|     |              |         | R cerebellum     | -1.29       | pre-treated |           |      |                                  |                               |
|     |              |         | L occipital      | 1.04        | pre-treated |           |      |                                  |                               |
| 39  | 40/F         | Breast  | R occipital      | 0.69        | responding  | 25        | 5    |                                  | 2                             |
|     |              |         | M cerebellum     | 2.25        | progressed  |           |      |                                  |                               |
| 40  | 58/F         | Breast  | L occipital      | -2.23       | responding  | 18        | 1    | lung, bone                       | 3                             |
| 47  | 55/F         | Breast  | R occipital      | 2.38        | responding  | 30        | 5    | liver, lymph nodes               | 5                             |
|     |              |         | R frontal        | -0.57       | responding  |           |      |                                  |                               |
|     |              |         | L frontal        | 0.36        | responding  |           |      |                                  |                               |

Table 1: (Supplementary) Summary of patients and lesions data. ID# indicates the assigned subject identifier, location is the lesion location in the brain, status is the clinical status of the lesion at six months post-SRS or death, Fracs is the number of fractions, Previous systemic therapies is the number of lines of systemic therapy prior to brain metastases. Abbreviations: NSCLC: non-small cell lung cancer, RCC: renal cell carcinoma, L: left, R: right, M: medial.
